# Supplementary material for: Anticoronavirus Evaluation of Antimicrobial Diterpenoids: Application of New Ferruginol Analogues
Source: MDPI journal article supplement (doi:10.3390/v15061342), 2023-06-09
Supplement: s1 [file s1]

## Supplementary Materials

# Anticoronavirus Evaluation of Antimicrobial Diterpenoids: Application of New Ferruginol Analogues

Mihayl Varbanov<sup>1,2</sup>, Stéphanie Philippot<sup>1</sup> and Miguel A. González-Cardenete<sup>3,\*</sup>

<sup>1</sup> Université de Lorraine, CNRS, L2CM, F-54000 Nancy, France.

<sup>2</sup> Laboratoire de Virologie, CHRU de Nancy Brabois, 54500 Vandoeuvre-lès-Nancy, France

<sup>3</sup> Instituto de Tecnología Química (UPV-CSIC), Universitat Politècnica de

Valencia-Consejo Superior de Investigaciones Científicas, Avenida de los Naranjos s/n,  
46022 Valencia, Spain

\* Correspondence: [migoncar@itq.upv.es](mailto:migoncar@itq.upv.es)

## Contents

Copies of <sup>1</sup>H NMR, <sup>13</sup>C NMR and <sup>19</sup>F spectra for new compounds **15** and **16**:

|                                                   |    |
|---------------------------------------------------|----|
| - <sup>1</sup> H NMR spectrum of <b>15</b> .....  | S1 |
| - <sup>13</sup> C NMR spectrum of <b>15</b> ..... | S2 |
| -DEPT135 spectrum of <b>15</b> .....              | S3 |
| - <sup>19</sup> F spectrum of <b>15</b> .....     | S4 |
| - <sup>1</sup> H NMR spectrum of <b>16</b> .....  | S5 |
| - <sup>13</sup> C NMR spectrum of <b>16</b> ..... | S6 |
| -DEPT135 spectrum of <b>16</b> .....              | S7 |
| - <sup>19</sup> F spectrum of <b>16</b> .....     | S8 |

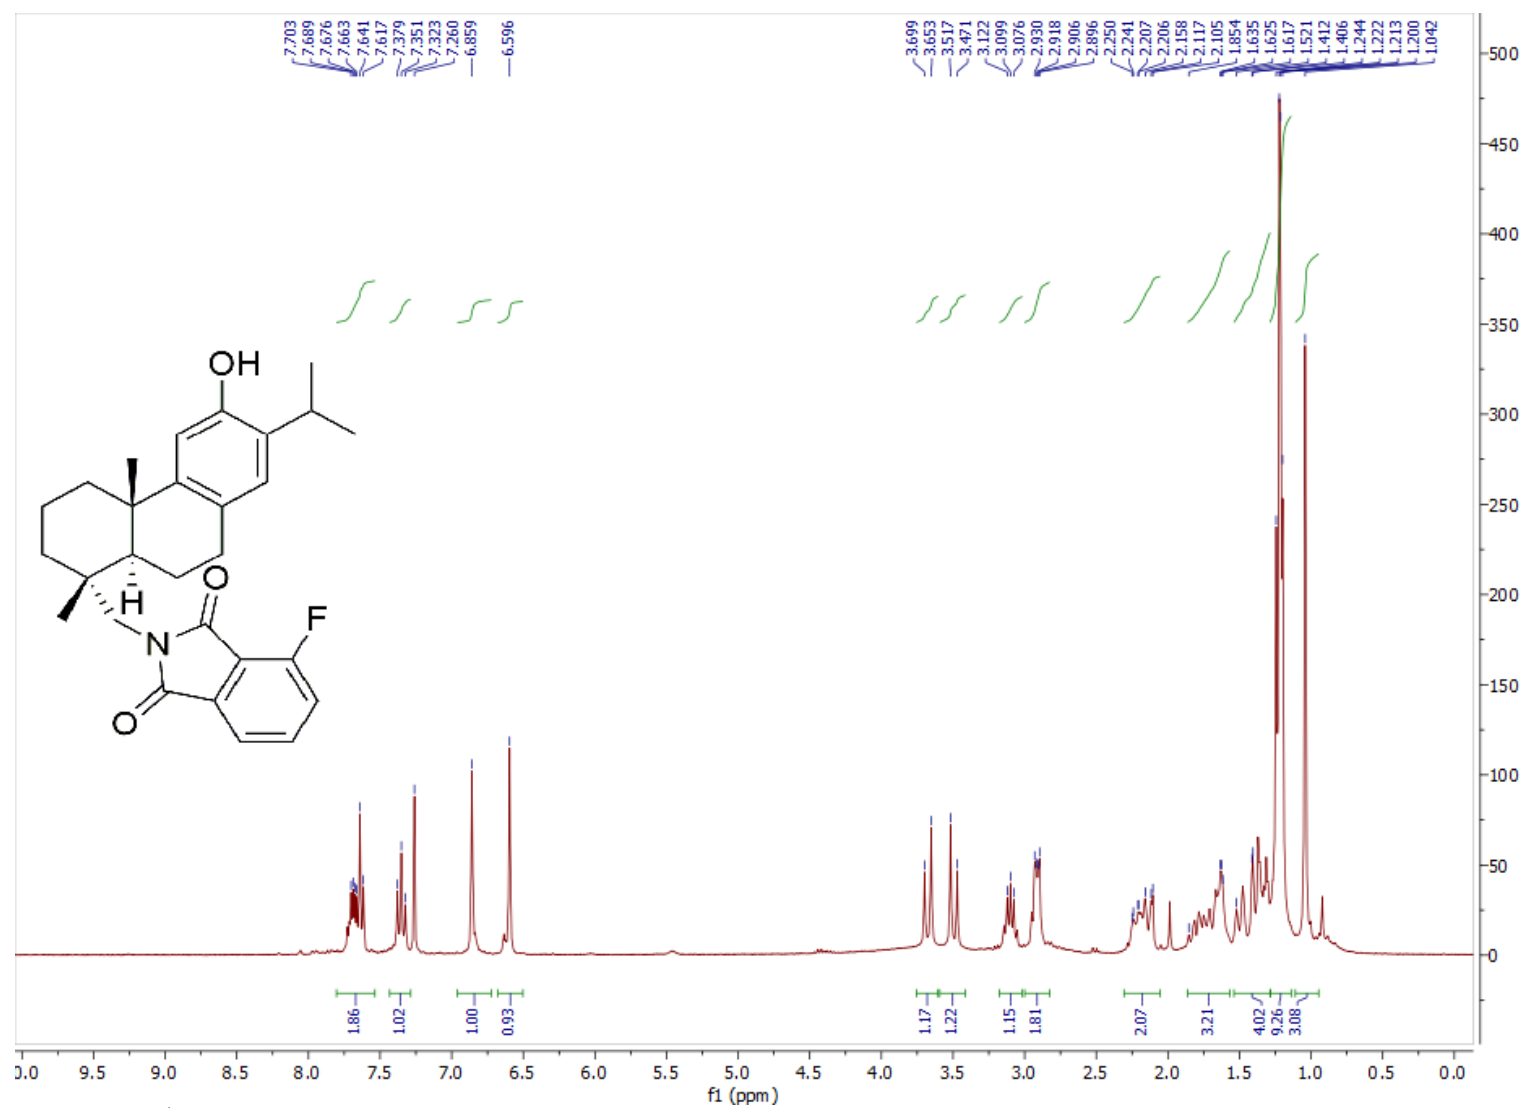

**Figure S1.**  $^1\text{H}$  NMR spectrum of **15**.

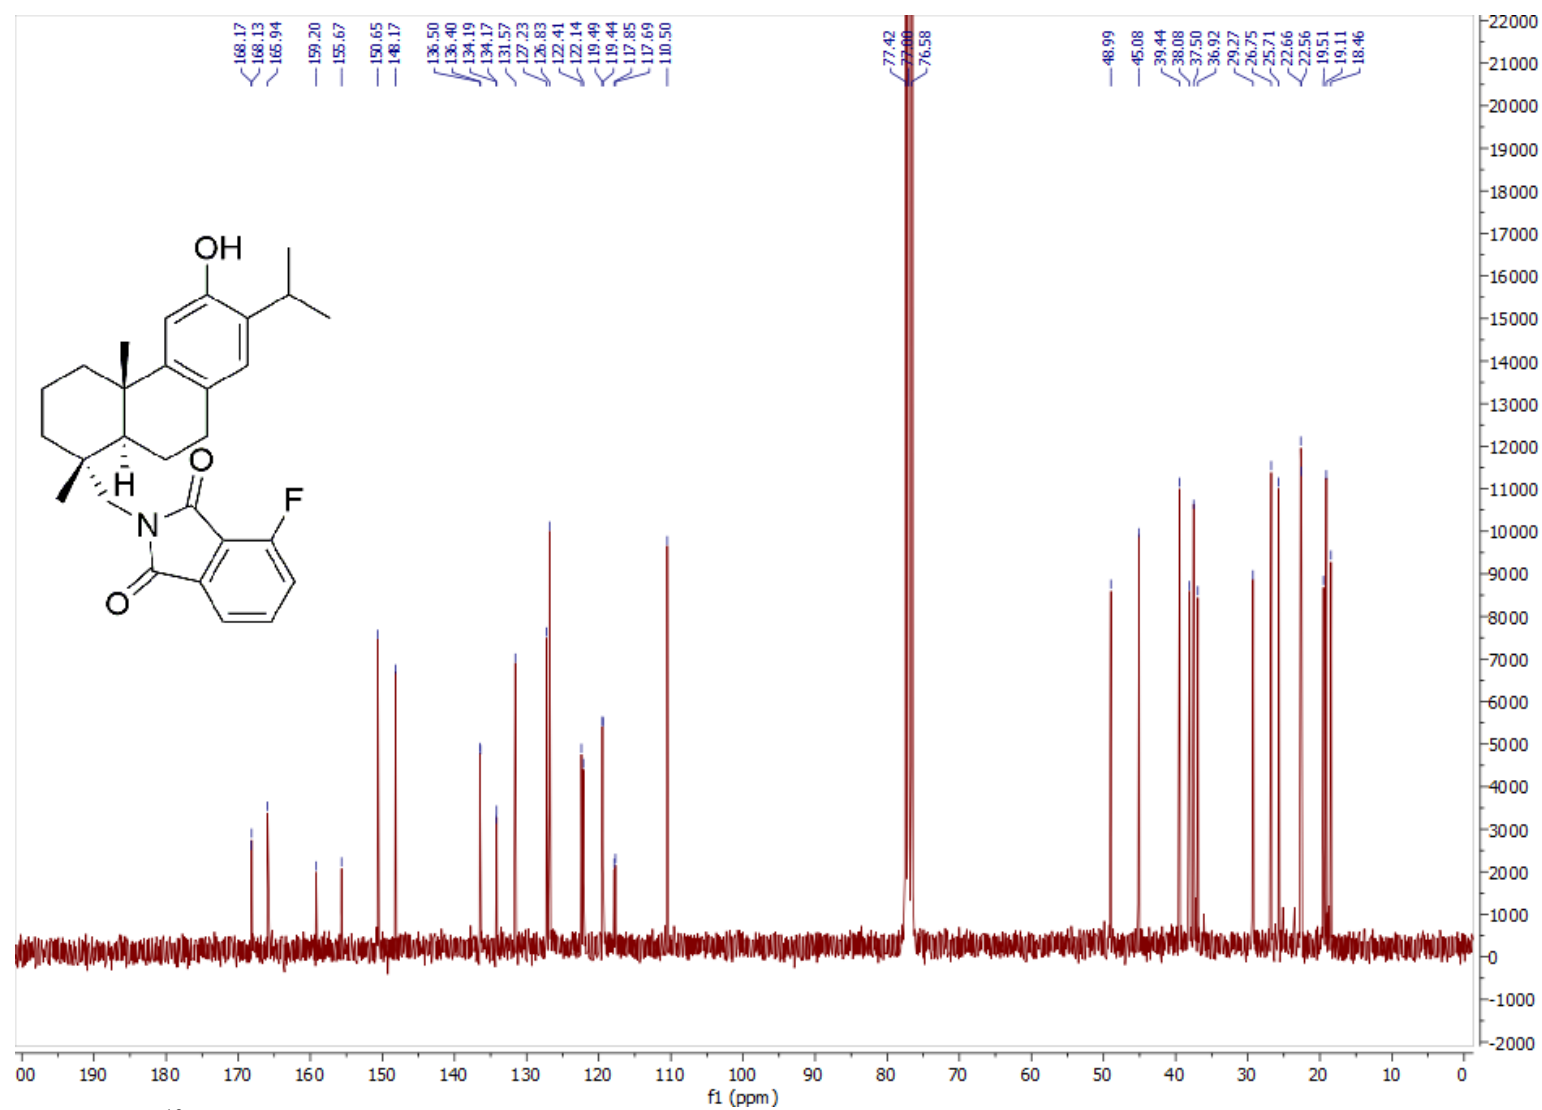

Figure S2.  $^{13}\text{C}$  NMR spectrum of 15.

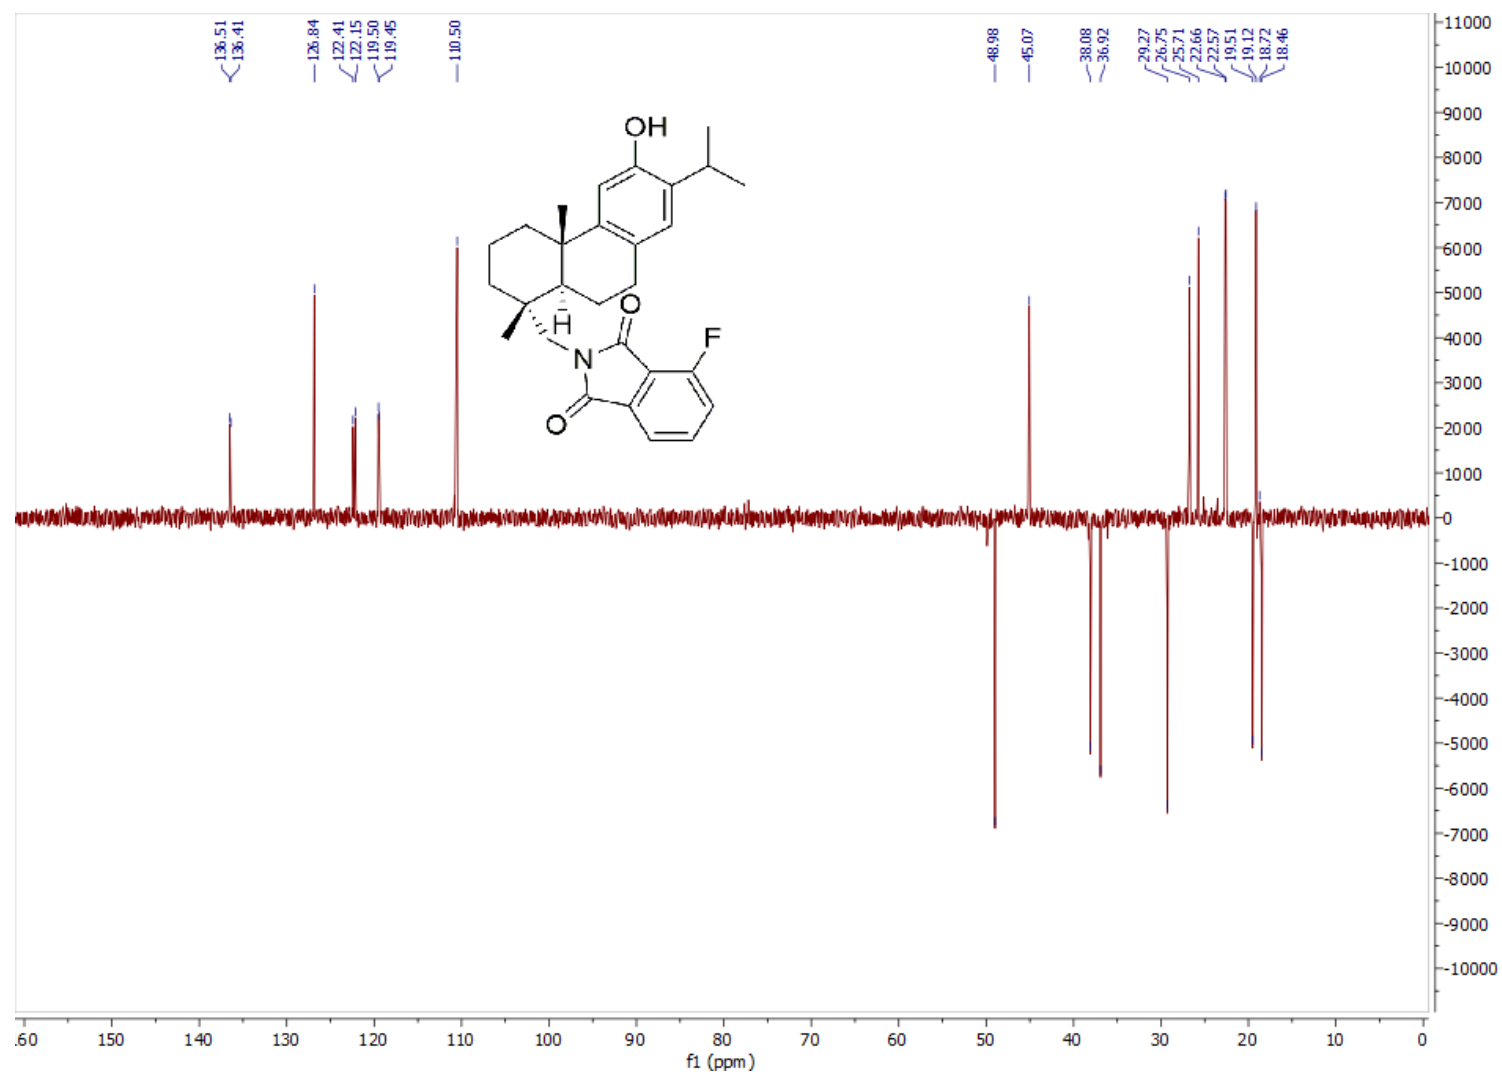

Figure S3. DEPT135 spectrum of 15.

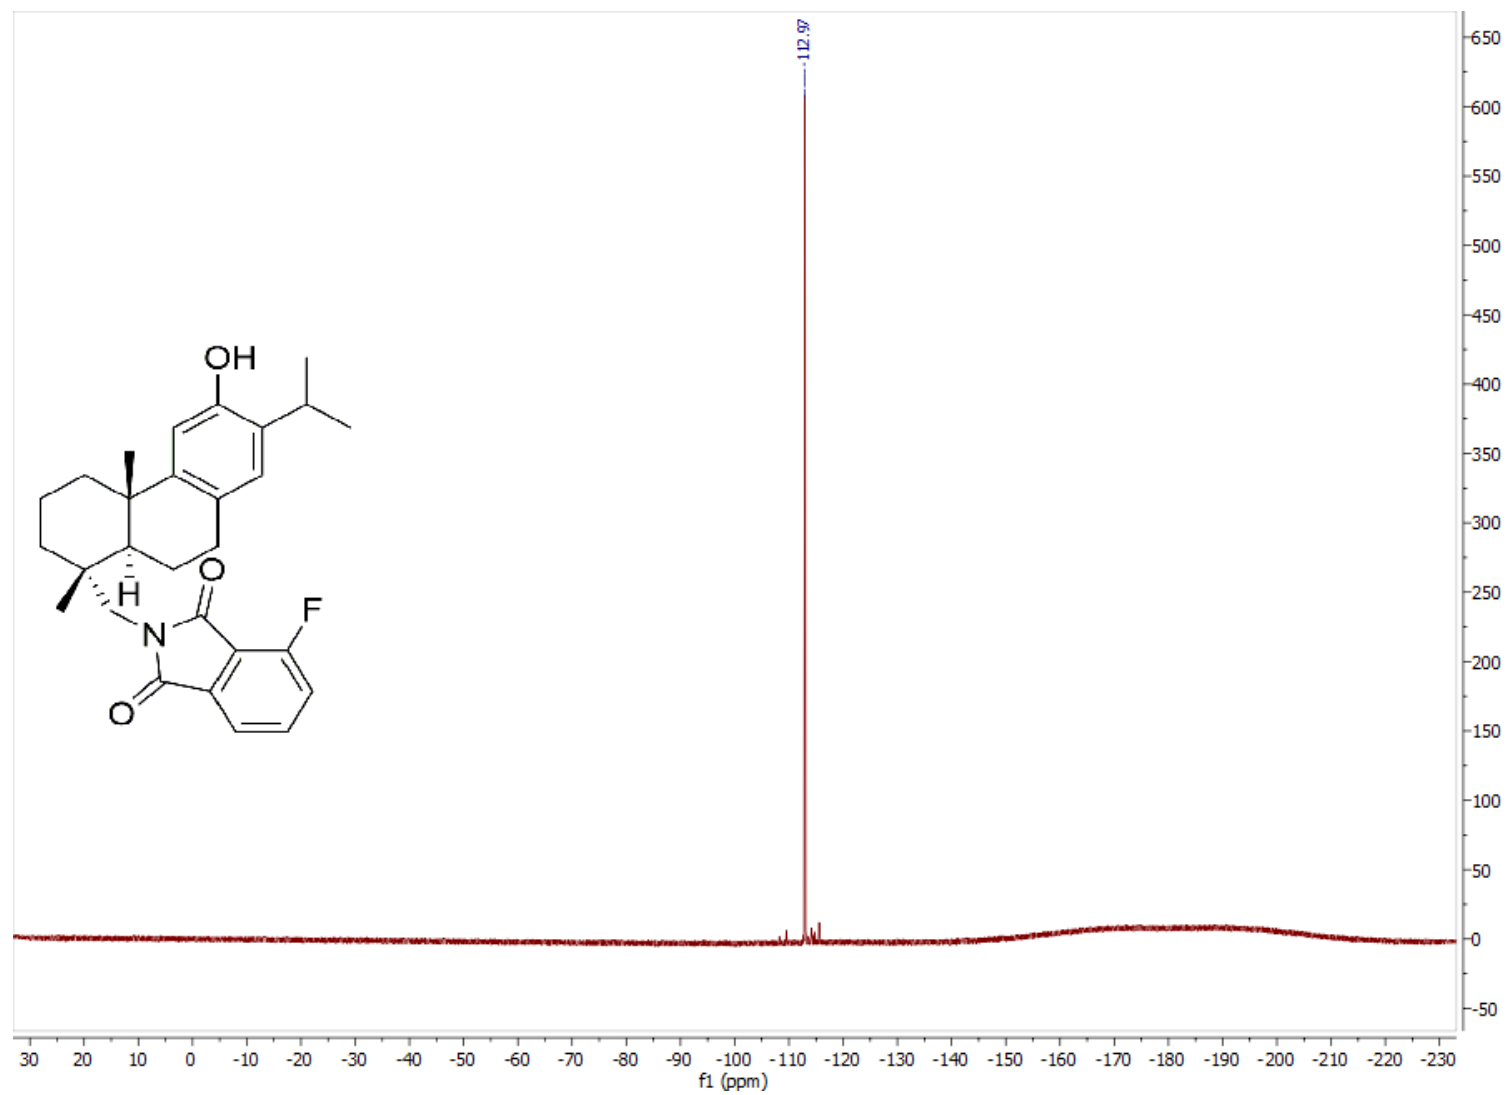

**Figure S4.**  $^{19}\text{F}$  spectrum of **15**.

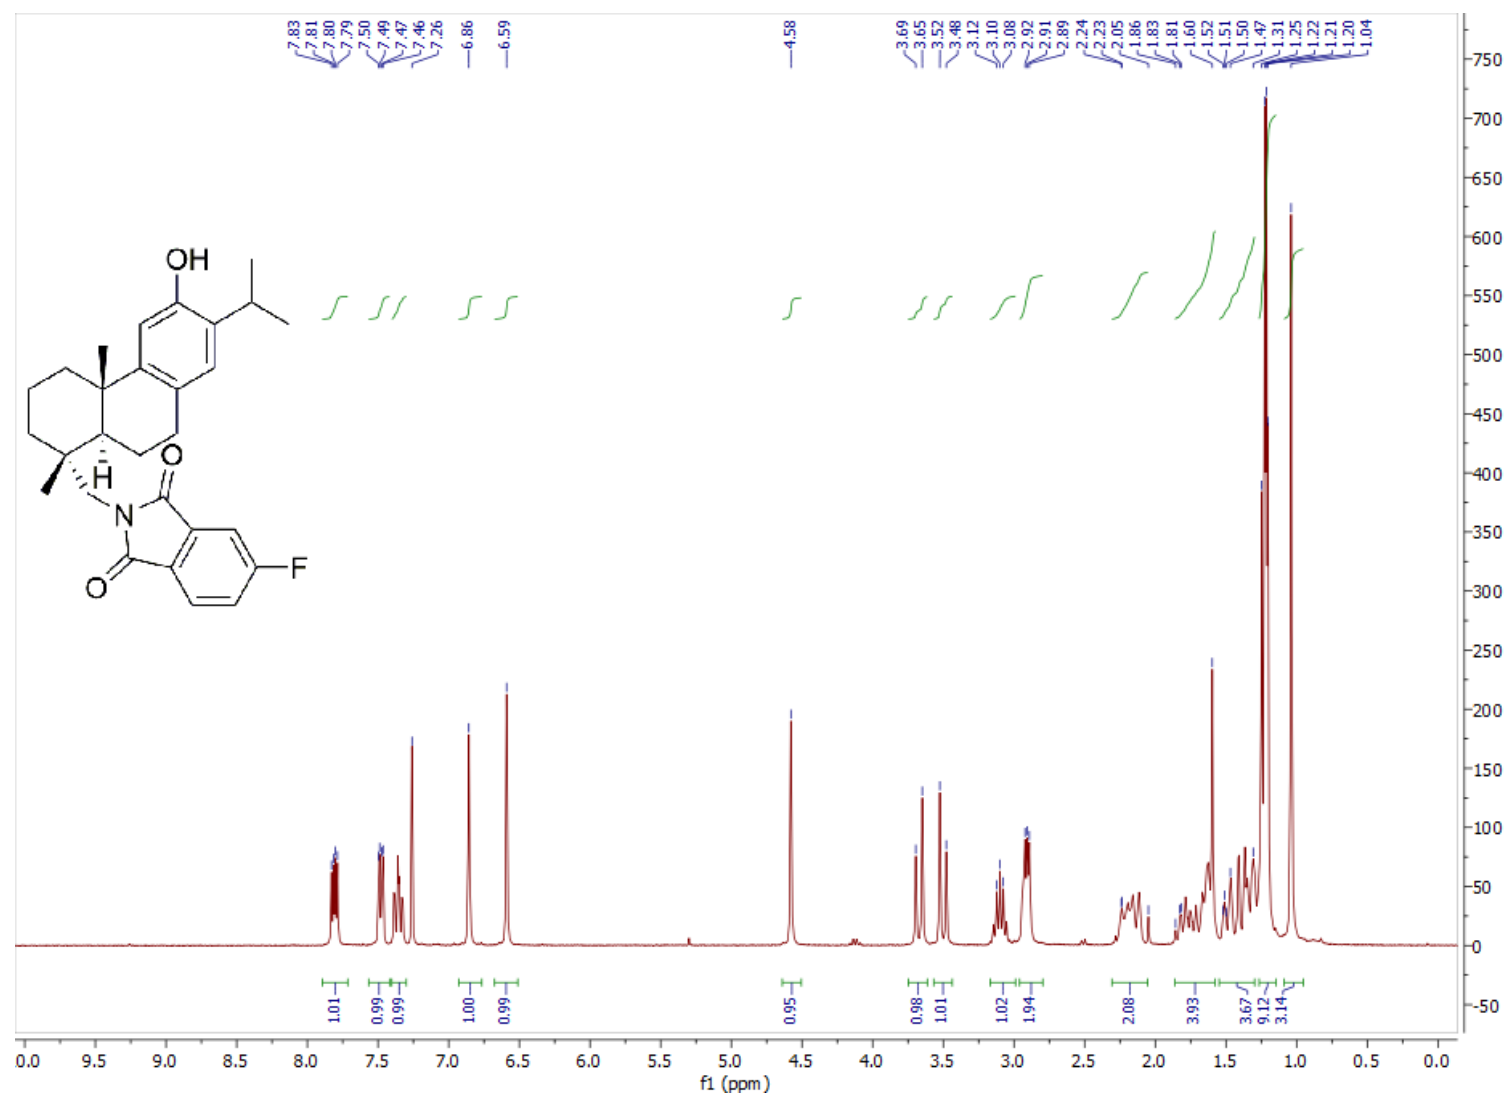

Figure S5.  $^1\text{H}$  NMR spectrum of 16.

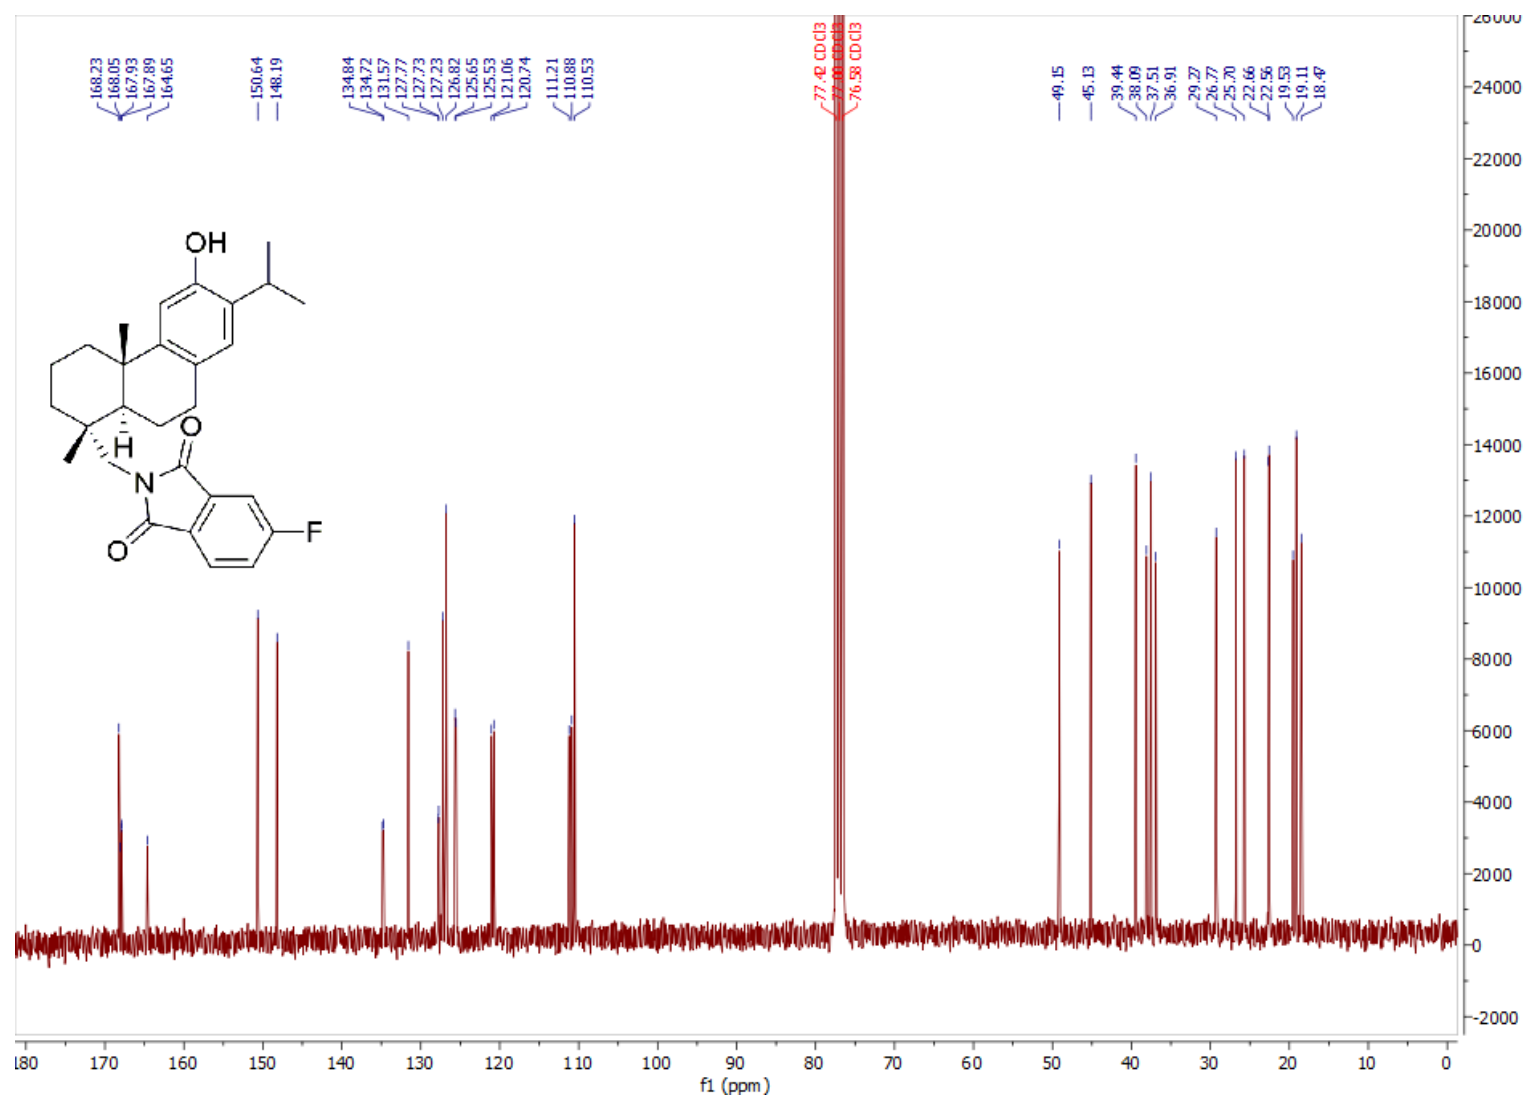

**Figure S6.**  $^{13}\text{C}$  NMR spectrum of 16.

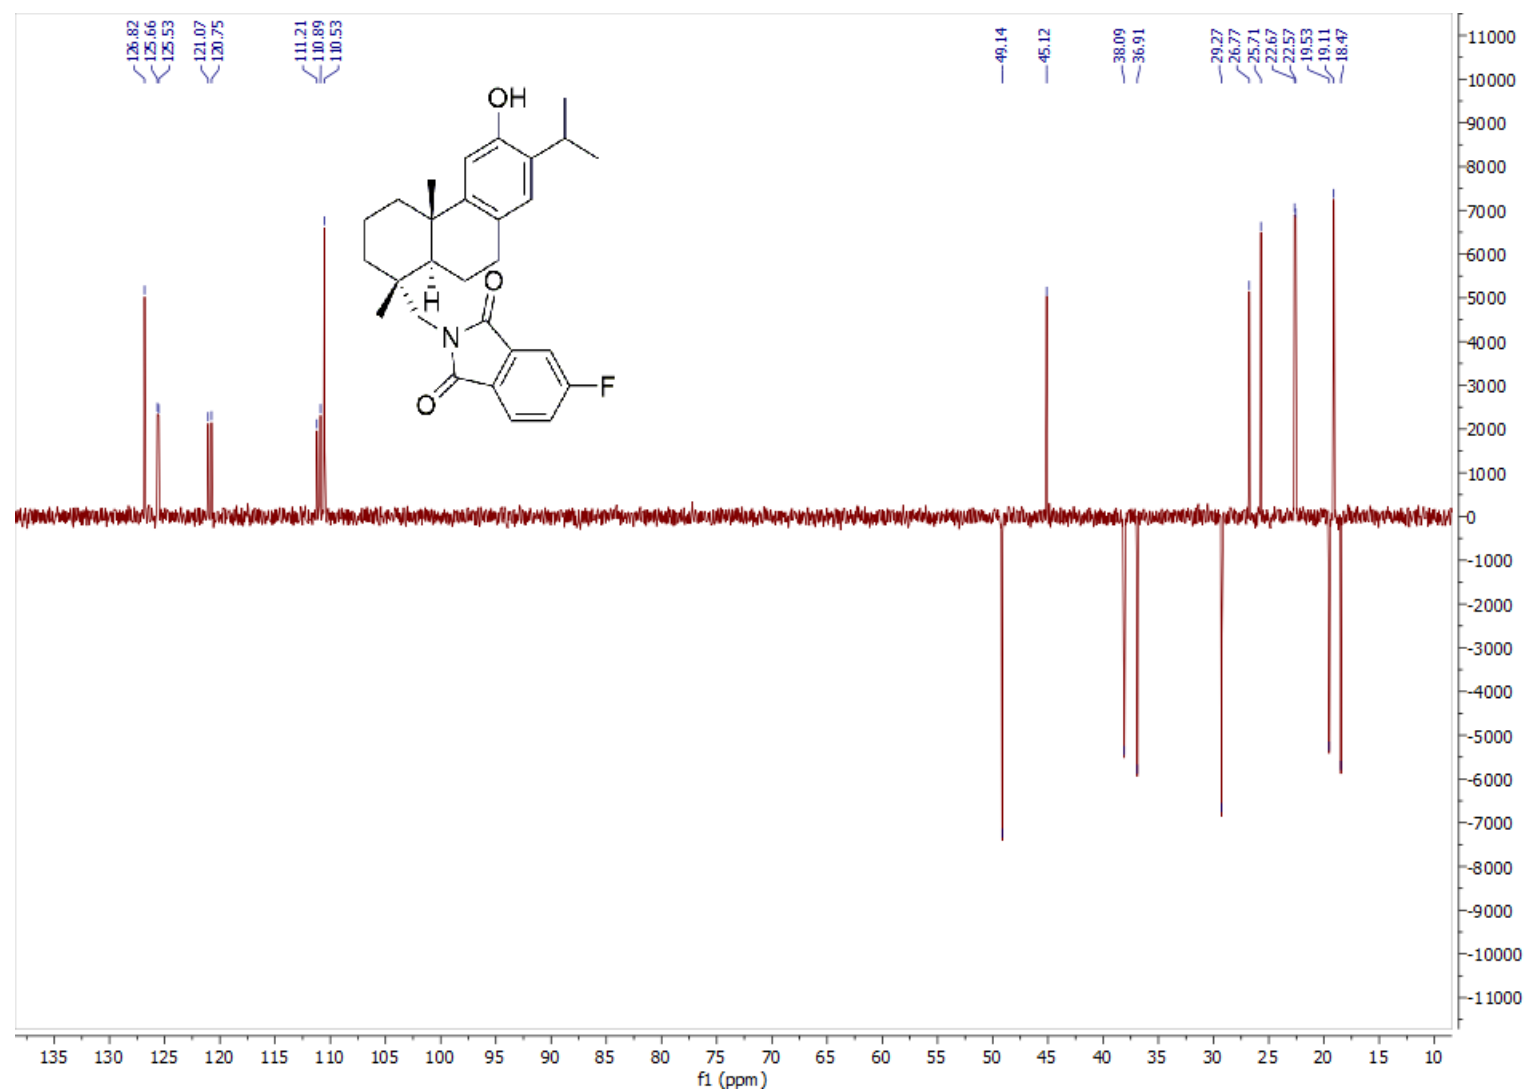

Figure S7. DEPT135 spectrum of **16**.



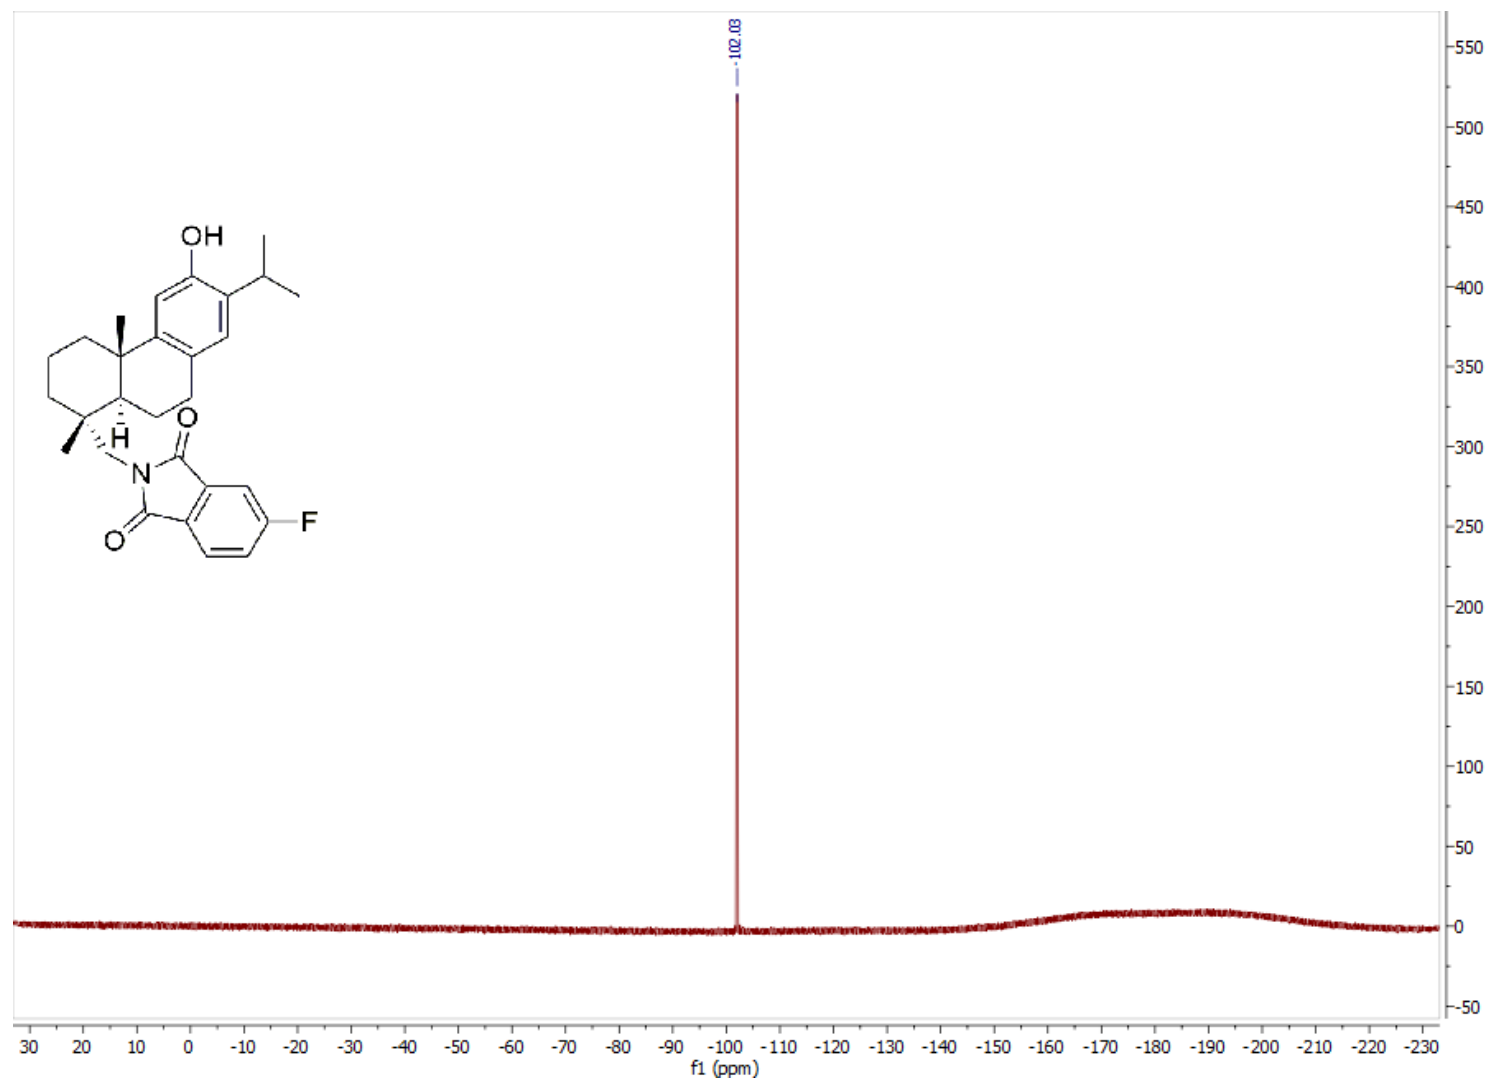

**Figure S8.**  $^{19}\text{F}$  spectrum of **16**.
